1 **TITLE: An African origin for *Mycobacterium bovis***

2

3

4 Chloé Loiseau<sup>1,2\*</sup>, Fabrizio Menardo<sup>1,2\*</sup>, Abraham Aseffa<sup>3</sup>, Elena Hailu<sup>3</sup>, Balako Gumi<sup>4</sup>,  
5 Gobena Ameni<sup>5</sup>, Stefan Berg<sup>6</sup>, Leen Rigouts<sup>7,8,9</sup>, Suelee Robbe-Austerman<sup>10</sup>, Jakob  
6 Zinsstag<sup>1,2</sup>, Sebastien Gagneux<sup>1,2\*</sup> and Daniela Brites<sup>1,2\*</sup>

7

8 <sup>1</sup>Swiss Tropical and Public Health Institute, Basel, Switzerland

9 <sup>2</sup>University of Basel, Basel, Switzerland

10 <sup>3</sup>Armauer Hansen Research Centre, Addis Ababa, Ethiopia

11 <sup>4</sup>Bule Hora University, Department of Animal Science and Range Management, Bule Hora  
12 Town, Ethiopia

13 <sup>5</sup>Addis Ababa University, Aklilu Lemma Institute of Pathobiology, Addis Ababa, Ethiopia

14 <sup>6</sup>Animal & Plant Health Agency (APHA), Bacteriology Department, Weybridge, Surrey,  
15 United Kingdom

16 <sup>7</sup>Mycobacteriology Unit, Department of Biomedical Sciences, Institute of Tropical Medicine,  
17 Antwerp, Belgium

18 <sup>8</sup>Collection of Mycobacterial Cultures (BCCM/ITM), Institute of Tropical Medicine,  
19 Antwerp, Belgium

20 <sup>9</sup>Department of Biomedical Sciences, Antwerp University, Antwerp, Belgium

21 <sup>10</sup>National Veterinary Services Laboratories, United States Department of Agriculture, Ames,  
22 Iowa, USA

23

24 Corresponding authors: [d.brites@swisstph.ch](mailto:d.brites@swisstph.ch); [sebastien.gagneux@swisstph.ch](mailto:sebastien.gagneux@swisstph.ch)

25 **\*equal contribution**

26

27 **ABSTRACT**

28

29 **Background and objectives**

30 *Mycobacterium bovis* and *Mycobacterium caprae* are two of the most important agents of  
31 tuberculosis (TB) in livestock and the most important causes of zoonotic TB in humans.  
32 However, little is known about the global population structure, phylogeography and  
33 evolutionary history of these pathogens.

34 **Methodology**

35 We compiled a global collection of 3364 whole-genome sequences from *M. bovis* and *M.*  
36 *caprae* originating from 35 countries and inferred their phylogenetic relationships, geographic  
37 origins and age.

38 **Results**

39 Our results resolved the phylogenetic relationship among the four previously defined clonal  
40 complexes of *M. bovis*, and another eight newly described here. Our phylogeographic analysis  
41 showed that *M. bovis* likely originated in East Africa. While some groups remained restricted  
42 to East- and West Africa, others have subsequently dispersed to different parts of the world.

43 **Conclusions and implications**

44 Our results allow a better understanding of the global population structure of *M. bovis* and its  
45 evolutionary history. This knowledge can be used to define better molecular markers for  
46 epidemiological investigations of *M. bovis* in settings where whole genome sequencing  
47 cannot easily be implemented.

48

49

## 50 BACKGROUND AND OBJECTIVES

51 Tuberculosis (TB) remains an important burden for global health and the economy [1]. TB is  
52 the number one cause of human death due to infection globally, with an estimated 10.0  
53 million new cases and 1.5 million deaths occurring every year [1]. TB is caused by members  
54 of the *Mycobacterium tuberculosis* complex (MTBC), which includes seven human-adapted  
55 lineages, and several animal-adapted ecotypes including *M. bovis* and *M. caprae*. Animal TB  
56 complicates the control of human TB due to the zoonotic transfer of TB bacilli from infected  
57 animals to exposed human populations e.g. through the consumption of unpasteurized milk or  
58 handling of contaminated meat [2]. *M. bovis* and *M. caprae* are the most important agents of  
59 TB in livestock and the most important agents of zoonotic TB in humans, causing an  
60 estimated 147 000 new human cases and 12 500 human deaths yearly [1, 3]. Zoonotic TB  
61 caused by *M. bovis* also poses a challenge for patient treatment, due to its natural resistance to  
62 pyrazinamide (PZA), one of the four first-line drugs used in the treatment of TB. In addition,  
63 TB in livestock accounts for an estimated loss of three billion US dollars per year [4]. In  
64 Africa, the prevalence of *M. bovis* is highest in peri-urban dairy belts of larger cities and  
65 remains at low levels in rural areas [5], often also threatening wildlife populations [6].  
66 During the last few years, analyses of large globally representative collections of whole  
67 genome sequences (WGS) from the human-adapted MTBC lineages have enhanced our  
68 understanding of the global population structure, phylogeography and evolutionary history of  
69 these pathogens [7]. By contrast, little corresponding data exist for the various animal-adapted  
70 ecotypes of the MTBC such as *M. bovis*.

71 Current knowledge about global *M. bovis* populations stems mostly from spoligotyping [8, 9].  
72 This method has been highly valuable for showing that *M. bovis* populations vary by  
73 geography, and defining strain families based on the presence or absence of spacers in the  
74 Direct Repeat region of the MTBC genome [8]. However, the discriminatory capacity of  
75 spoligotyping is limited since diversity is measured at a single locus prone to convergent  
76 evolution and phylogenetic distances cannot be reliably inferred [10].

77 In addition to spoligotyping, other genomic markers such as deletions [11-14] and single  
78 nucleotide polymorphisms (SNPs) [14], have given insights into the biogeography of *M.*  
79 *bovis*. These markers have been used to define four major groups of genotypes within *M.*  
80 *bovis*, known as clonal complexes European 1 and 2 (Eu1, Eu2) and African 1 and 2 (Af1 and  
81 Af2) [11-14]. Bovine TB in West Africa and East Africa is mainly caused by the clonal  
82 complexes Af1 and Af2, respectively [11, 12]. Bovine TB in Europe and in the Americas is  
83 caused by clonal complex Eu1, which affects mostly the British Islands and former trading

84 countries of the UK [13], while Eu2 is prevalent mostly in the Iberian Peninsula and Brazil  
85 [14].  
86 More recently, studies based on WGS have brought deeper insights into the population  
87 dynamics of *M. bovis* and showed that unlike *M. tuberculosis*, wild animals can act as *M.*  
88 *bovis* reservoirs in different regions of the world [15-18]. However, most studies using WGS  
89 have aimed at investigating local epidemics, and little is known about the global population  
90 structure and evolutionary history of *M. bovis*. Recently, we suggested a scenario for the  
91 evolution of the animal-adapted MTBC, in which we propose that *M. caprae* and *M. bovis*  
92 might have originally come out of Africa [19]. Here we gathered 3356 *M. bovis* and *M.*  
93 *caprae* WGS from the public domain, to which we added eight new *M. bovis* sequences from  
94 strains isolated in East Africa. Our results provide a phylogenetic basis to better understand  
95 the global population structure of *M. bovis*. Moreover, they point to East Africa as the most  
96 likely origin of contemporary *M. bovis*.  
97  
98

## 99    **METHODS**

100

### 101    **Data collection**

102    A total of 3929 *M. bovis* genomes were retrieved from EBI: 3834 BioSamples were registered  
103    on EBI with the taxon id 1775 (corresponding to “*Mycobacterium tuberculosis* variant bovis”)  
104    and downloaded on the 11<sup>th</sup> of March 2019 and 95 *M. bovis* genomes were registered under  
105    taxon id 1765 (corresponding to “*Mycobacterium tuberculosis*”).

106    Of these, 457 were excluded because they were part of pre-publications releases from the  
107    Wellcome Trust Sanger Institute, 130 were excluded because they were registered as BCG –  
108    Bacille Calmette Guérin, the vaccine strain derived from *M. bovis*, one genome was excluded  
109    because it was wrongly classified as *M. bovis*, and three samples were excluded because they  
110    corresponded to RNA-seq libraries.

111    In addition, we added 81 publically available *M. caprae* genomes and eight previously  
112    unpublished sequences from *M. bovis* isolated in Ethiopia (n=7) and Burundi (n=1). The  
113    sequencing data has been deposited in the European Nucleotide Archive (EMBL-EBI) under  
114    the study ID PRJEB33773.

115    From this total of 3427 genomes, 63 sequences were excluded because they did not meet our  
116    criteria for downstream analyses (average whole-genome coverage below 7, ratio of  
117    heterogeneous SNPs to fixed SNPs above 1), yielding a final dataset of 3364 genomes (Fig.  
118    S1, Table S1). Geographical origin of the isolates, date of isolation and host metadata were  
119    recovered from EBI (Table S1).

120

### 121    **Whole genome sequence analysis**

122    All samples were subject to the same whole-genome sequencing analysis pipeline, as  
123    described in [20]. In brief, reads were trimmed with Trimmomatic v0.33 [21]. Only reads  
124    larger than 20 bp were kept for the downstream analysis. The software SeqPrep  
125    (<https://github.com/jstjohn/SeqPrep>) was used to identify and merge any overlapping paired-  
126    end reads. The resulting reads were aligned to the reconstructed ancestral sequence of the  
127    MTBC [22] using the MEM algorithm of BWA v0.7.13 [23] with default parameters.

128    Duplicated reads were marked using the MarkDuplicates module of Picard v2.9.1  
129    (<https://github.com/broadinstitute/picard>). The RealignerTargetCreator and IndelRealigner  
130    modules of GATK v 3.4.0 were used to perform local realignment of reads around InDels  
131    [24]. Finally, SNPs were called with Samtools v1.2 mpileup [25] and VarScan v2.4.1 [26]  
132    using the following thresholds: minimum mapping quality of 20, minimum base quality at a

133 position of 20, minimum read depth at a position of 7X, maximum strand bias for a position  
134 90%. Only SNPs considered to have reached fixation within an isolate (frequency within-  
135 isolate  $\geq 90\%$ ) were considered. For SNPs with  $\leq 10\%$  frequency, the ancestor state was called.  
136 SNPs were annotated using snpEff v4.1.144 [27], using the *M. tuberculosis* H37Rv reference  
137 annotation (NC\_000962.3) as the genome of *M. bovis* (AF2122/97) has no genes absent from  
138 H37Rv except for TbD1 (contains *mmpS6* and the 5' region of *mmpL6*) [28].

139

#### 140 ***In silico* spoligotyping, genomic deletions and previously defined clonal complexes**

141

142 The spoligotype pattern of the 3364 genomes was determined *in silico* using KvarQ [29]. The  
143 results were submitted to the *Mycobacterium bovis* spoligotype database  
144 <https://www.mbovis.org/> [30] and SB numbers obtained.

145 All 3364 genomes were screened *in silico* for the presence of molecular markers defining the  
146 previously described *M. bovis* clonal complexes; i.e. for the presence or absence of the  
147 genomic deletions RDAf1, RDAf2, RDEu1 (also known as RD17) [11-13], and in the case of  
148 Eu2 [14], for the presence of SNP 3813236 G to A with respect to the H37Rv  
149 (NC\_000962.3). Other deletions, RD4, RDpan and N-RD17, previously used to genotype *M.*  
150 *bovis* lineages were also screened for [31-33]. The genomic coordinates in H37Rv  
151 (NC\_000962.3) used to determine each deletion were the following; RDAf1 (664254-  
152 669601); RDAf2 (680337-694429); RDEu1 (1768074-1768878); RD4 (1696017-1708748);  
153 RDpan (4371020-4373425); N-RD17 (3897069-3897783). A genomic region was considered  
154 deleted if the average coverage over the region was below two.

155

#### 156 **Phylogenetic analyses**

157 All phylogenetic trees were inferred with RAxML (v.8.2.12) using alignments containing  
158 only polymorphic sites. A position was considered polymorphic if at least one genome had a  
159 SNP at that position with a minimum percentage of reads supporting the call of 90%.  
160 Deletions and positions not called according to the minimum threshold of 7, were encoded as  
161 gaps. We excluded positions with more than 10% missing data, positions falling in PE/PPE  
162 genes, phages, insertion sequences and in regions with at least 50 bp identity to other regions  
163 in the genome [34]. Positions falling in drug resistance-related genes were also excluded. The  
164 alignment used to produce Figure 2 comprised 22 492 variable positions and the alignment  
165 used to produce Figure S2 comprised 45 981 variable positions.

166 Maximum likelihood phylogenies were computed using the general time-reversible model of  
167 sequence evolution (-m GTRCAT -V options), 1,000 rapid bootstrap inferences, followed by  
168 a thorough maximum-likelihood search performed through CIPRES [35]. All phylogenies  
169 were rooted using a *M. africanum* Lineage (L) 6 genome from Ghana (SAMEA3359865).

170

### 171 **Obtaining a representative dataset of *M. bovis* genomes - Subsampling 1**

172

173 Our phylogenetic reconstruction indicated that sequences belonging to clonal complex Eu1  
174 and Eu2 were over-represented in the initial 3364 genome dataset, particularly from the USA,  
175 Mexico, New Zealand and the UK. To obtain a smaller dataset with a more even  
176 representation of the different phylogenetic groups, we pruned the 3364 genomes using the  
177 following criteria: 1) we removed all genomes with non-available country metadata (n=739),  
178 which resulted in 2625 genomes; 2) we used Treemmer v0.2 [20] with the option *-RTL 99* to  
179 keep 99% of the original tree length and the option *-lm* to include a list of taxa to protect from  
180 pruning. This list included all genomes belonging to clonal complexes Af1 and Af2, as well  
181 as any genome belonging to any unclassified clade; 3) we visually identified monophyletic  
182 clades with all taxa from the same country and used Treemmer v0.2 [20], using options *-lmc*  
183 and *-lm*, to only keep a few representatives of each of these clades. To have representatives of  
184 the BCG clade, we kept 11 BCG genomes from [36]. This selection process rendered a  
185 dataset of 476 genomes.

186

### 187 **Ancestral reconstruction of geographic ranges - Subsampling 2**

188

189 To infer the geographic origin of the ancestors of the main groups of *M. bovis* and *M. caprae*,  
190 we used the 476 genomes dataset (see subsampling 1) and excluded all BCG genomes and all  
191 *M. bovis* from human TB cases or from unknown hosts, if the strains were isolated in a low  
192 incidence TB country (Europe, North America, Oceania). This is justified by the fact that the  
193 majority of such cases correspond to immigrants from high incidence countries that were  
194 infected in their country of origin, i.e. country of isolation does not correspond to the native  
195 geographic range of the strain and is thus not informative for the geographic reconstruction.  
196 *M. bovis* from patients in high incidence countries were kept (Table S1). The resulting dataset  
197 was composed of 392 genomes.

198 For the ancestral reconstruction of geographic ranges, we used the geographic origin of the  
199 strains and the phylogenetic relationships of the 392 genomes. Geographic origin was treated

200 as a discrete character to which 13 states, corresponding to UN-defined regions, were  
201 assigned. To select the best model of character evolution, the function `fitMk` from the package  
202 `phytools` 0.6.60 in R 3.5.0 [37] was used to obtain the likelihoods of the models ER (equal-  
203 rates), SYM (symmetrical) and ARD (all rates different) [38]. A Likelihood Ratio Test (LRT)  
204 was used to compare the different log-Likelihoods obtained. According to the former, the best  
205 fitting model was SYM, a model that allows states to transition at different rates in a  
206 reversible way, i.e. reverse and forward transitions share the same parameters (Table S2). The  
207 function `make.simmap` in `phytools` package 0.6.60 in R 3.5.0 [37, 39] was used to apply  
208 stochastic character mapping as implemented in SIMMAP [40] on the 392 genomes  
209 phylogeny inferred from the best-scoring ML tree rooted on L6, using the SYM model with  
210 100 replicates. We summarized the results of the 100 replicates using the function `summary` in  
211 `phytools` package 0.6.60 in R [37].

212

213

### 214 **Molecular Dating of *M. bovis* and *M. caprae* – Subsampling 3**

215

216 For the molecular clock analyses, we considered only genomes for which the date of isolation  
217 was known (n=2058). For the eight genomes sequenced in this study, the date of isolation was  
218 retrieved at a later point, and these strains were not included in the dating analysis (Table S1).

219 We used a pipeline similar to that reported in [20]. We built SNP alignments including  
220 variable positions with less than 10% of missing data (alignment length; 24 828 variable  
221 positions). We added an L6 strain as outgroup (SAMEA3359865) and inferred the Maximum  
222 Likelihood tree as described above. Since the alignment contained only variable positions, we  
223 rescaled the branch lengths of the trees:  $\text{rescaled\_branch\_length} = ((\text{branch\_length} * \text{alignment\_length}) / (\text{alignment\_length} + \text{invariant\_sites}))$ . To evaluate the strength of the  
224 temporal signal, we performed root-to-tip regression using the R package `ape` [41].

225  
226 Additionally, we used the least square method implemented in LSD v0.3-beta [42] to estimate  
227 the molecular clock rate in the observed data and performed a date randomization test with  
228 100 randomized datasets. To do this, we used the quadratic programming dating (QPD)  
229 algorithm and calculated the confidence interval (options -f 100 and -s).

230 We also estimated the molecular clock rates using a Bayesian analysis. For this, we reduced  
231 the dataset to 300 strains with Treemmer v0.2 in the following way: we randomly subsampled  
232 strains, maintaining the outgroup and at least one representative of four small clades of the  
233 tree that would have disappeared with simple random subsampling strategy (Af2 clonal



234 complex: G42133; Afl clonal complex: G02538; *PZA\_sus\_unknown1*: G04143, G04145,  
235 G04147; *M. caprae*: G42152, G42153, G37371, G37372, G41838; Table S1). The resulting  
236 alignment included 13 012 variable sites (subset1).

237 We used jModelTest 2.1.10 v20160303 [43] to identify the best fitting nucleotide substitution  
238 model among 11 possible schemes, including unequal nucleotide frequencies (total models =  
239 22, options -s 11 and -f). We performed Bayesian inference with BEAST2 [44]. We corrected  
240 the xml file to specify the number of invariant sites as indicated here:

241 <https://groups.google.com/forum/#!topic/beast-users/QfBHMOqImFE>, and used the tip  
242 sampling years to calibrate the molecular clock.

243 We used the uncorrelated lognormal relaxed clock model [45], the best fitting nucleotide  
244 substitution model according to the results of jModelTest (all criteria selected the  
245 transversional model (TVM) as the best model), and three different coalescent priors: constant  
246 population size, exponential population growth and the Bayesian Skyline [46]. We chose a 1/x  
247 prior for the population size [0- 10<sup>9</sup>], a 1/x prior for the mean of the lognormal distribution of  
248 the clock rate [10<sup>-10</sup> – 10<sup>-5</sup>], and the standard Gamma distribution as prior for the standard  
249 deviation of the lognormal distribution of the clock rate [0 – infinity]. For the exponential  
250 growth rate prior, we used the standard Laplace distribution [-infinity – infinity]. For all  
251 analyses, we ran two runs and used Tracer 1.7.1 [47] to evaluate convergence among runs and  
252 to calculate the estimated effective sample size (ESS). We stopped the runs when they reached  
253 convergence, and the ESS of the posterior and of all parameters were larger than 200. The  
254 number of generations ranged from 150 to 300 million depending on the run. We used Tracer  
255 [48] to identify and exclude the burn-in, which ranged from 4 to 30 million generations,  
256 depending on the run.

257 Since the BEAST analysis was based on a sub-sample of the data, we tested the robustness of  
258 the sub-sampling by repeating twice the sub-sampling with Treemmer [20]. This resulted in  
259 two alignments of 13 272 and 12 820 SNPs, respectively (subset2 and subset3). We then  
260 repeated all the BEAST analyses described above on these two additional datasets. For the  
261 BEAST analyses, all trees were summarized in a maximum clade credibility tree with the  
262 software Treeannotator (part of the BEAST package), after removing the burn-in and sub-  
263 sampling one tree every 10 000 generations.

264

265

## 266 RESULTS AND DISCUSSION

267

### 268 Phylogenetic inference of *M. bovis* and *M. caprae* populations

269

270 The phylogenetic reconstruction of all *M. bovis* and *M. caprae* sequences obtained (n=3364)  
271 confirmed that these two ecotypes correspond to two monophyletic groups, despite infecting  
272 similar hosts [49, 50] (Fig. S3). The range of host species from which *M. bovis* was isolated is  
273 broad, confirming that *M. bovis* can cause infection in many different mammalian species  
274 (Table S1). Our collection of *M. caprae* included genomes from Japan (isolated in elephants  
275 from Borneo) [51], China (isolated in primates, Table S1) and Peru (host information  
276 unavailable, but possibly human [52]), suggesting that the host and geographic distribution of  
277 this ecotype ranges well beyond Southern- and Central Europe [53, 54]. One group of *M.*  
278 *caprae* genomes with origin in Germany contained a deletion of 36-38 kb, which  
279 encompasses the region of difference RD4 (Table S1). This is in agreement with a previous  
280 study reporting Alpine *M. caprae* isolates as RD4 deleted, using conventional RD typing [55].  
281 For all *M. bovis* genomes, we determined *in silico* clonal complexes Eu1, Eu2, Af1 and Af2  
282 and spoligotypes, and mapped them on the phylogenetic tree and onto a world map (Fig. 1,  
283 Fig. S2-S3, Table S1). All previously described clonal complexes corresponded to  
284 monophyletic groups in our genome-based phylogeny (Fig. S3). The phylogenetic tree also  
285 revealed *M. bovis* representatives that did not fall into any of the previously described clonal  
286 complexes (n=175, 5.3%, Fig. 1, Fig. S2-S3, Table S1). These belonged to eight  
287 monophyletic clades with unknown classification and to a few singleton branches (Fig. S3).  
288 The tree topology showed a strong bias towards closely related strains, in particular among  
289 Eu1, which reflects the different sampling and WGS efforts in the different geographic  
290 regions (Fig. 1, Fig. S3). Closely related genomes inform the local epidemiology but not the  
291 middle/long term evolutionary history of the strains and were thus excluded from further  
292 analysis (Subsampling 1, see Methods).

293 Two deep divergence events in *M. bovis* populations were notorious: one giving rise to an  
294 unclassified lineage we named *M. bovis PZA\_sus\_unknown1* (RD4 deleted as other *M. bovis*),  
295 which included five samples from Uganda (isolated from *Bos taurus* cattle, Table S1), three  
296 from Malawi (isolated from humans, Table S1) and one isolated from an antelope in Germany  
297 (Table S1). These *M. bovis* isolates lacked the *PncA* H57D mutation that is responsible for the  
298 intrinsic pyrazinamide resistance of canonical *M. bovis* as reported previously [56] (Fig. 2).  
299 This clade, retained the region of difference N-RD17, unlike all remaining *M. bovis*, and is

300 probably related to a group of strains previously isolated from cattle in Tanzania and reported  
301 as “ancestral” by [31] (Fig. 2). In agreement with that, our *PZA\_sus\_unknown1* clade had  
302 other deletions reported as specific to these Tanzanian isolates; a larger deletion  
303 encompassing RDpan (RDbovis(a)\_Δpan) and RDbovis(a)\_kdp [31]. The second deep  
304 branching lineage included all other *M. bovis* strains descendent from an ancestor that  
305 acquired the *PncA* H57D mutation and therefore encompasses all previously described clonal  
306 complexes [8, 14], as well as the other previously unclassified clades we describe here.

307  
308 From the *M. bovis* PZA resistant ancestor strains, two main splits occurred; one split led to the  
309 ancestor of Af2 and its previously unclassified sister clade which we called *unknown2* and  
310 which contains the BCG vaccine strains (Fig. 2). *M. bovis* strains with spoligotyping patterns  
311 similar to BCG have previously been referred to as “BCG-like”. However, our genome-based  
312 phylogeny shows that BCG-like spoligotyping patterns are present in several clades and have  
313 thus little discriminatory power [10] (Fig. 2, Table S4). In Af2 and *unknown2* the region of  
314 difference RDpan is present [31] (Fig. 2). Otherwise, RDpan is deleted in all other *M. bovis*  
315 except for the *unknown3* clade, in which it is polymorphic (Fig. 2). The other split led to the  
316 ancestor, from which all remaining *M. bovis* strains evolved, i.e. Af1, Eu2 and Eu1 as well as  
317 other groups (Fig. 2). Interestingly, Af1 does not share a MRCA with Af2 but with Eu1 and  
318 Eu2 as well as with another unclassified group, which we called *unknown3* (Fig. 2). Clonal  
319 complexes Eu1 and Eu2 share a MRCA together with five other *unknown* clades (*unknown 4*  
320 – *unknown 8*). Eu2 is more closely related to clades *unknown4* and 5, than to Eu1 (Fig. 2).  
321 Eu1 in turn shares a common ancestor with three other clades *unknown6*, 7 and 8 (Fig. 2).

322

### 323 **The temporal and geographic origin of *M. bovis***

324

325 Our reconstruction of ancestral geographical ranges points to East Africa as the most likely  
326 origin for the ancestor of all *M. bovis* (Fig. 2, Fig. S4). This is supported by the fact that the  
327 basal clade *M. bovis* - *PZA\_sus\_unknown1* has an exclusively East African distribution and is  
328 pyrazinamide susceptible. Pyrazinamide susceptibility in *M. bovis* is probably an ancestral  
329 character given that all other lineages of the MTBC are pyrazinamide susceptible.

330 Alternatively, the ancestral *M. bovis* pyrazinamide susceptible populations could have had a  
331 much broader geographic distribution, which later became restricted to East Africa. For *M.*  
332 *caprae*, the sampling was too small and biased (Table S1) and no conclusions can be  
333 confidently drawn. We performed tip-dating calibration using the isolation dates of the strains

334 with both Bayesian methods and LSD (see methods). Both the tip-to-root regression and the  
335 randomization tests performed indicated a temporal signal in the data (Fig. S5). We estimated  
336 a clock rate of between  $6.66 \times 10^{-8}$  and  $1.26 \times 10^{-7}$  for the BEAST analyses (Table S3), and  
337 between  $6.10 \times 10^{-8}$  and  $8.29 \times 10^{-8}$  for the LSD analysis. These results are in line with the  
338 results of previous studies [15, 57]. The common ancestor of *M. bovis* was estimated to have  
339 evolved between the years 256 and 1125 AD by the Bayesian analysis (cumulative range of  
340 the 95% Highest Posterior Density (HPD) of all nine BEAST analyses) and in the year 388  
341 AD by LSD (Fig. 3, TreeS1-S10). Together, these estimates suggest that *M. bovis* has  
342 emerged in East Africa sometime during the period spanning the 3<sup>rd</sup> to the 12<sup>th</sup> century AD  
343 (Fig. 3). However, the credibility intervals of the different analysis spanned several centuries.  
344 This was due to the intrinsic uncertainty of dating ancestral nodes when the clock calibration  
345 is based on the sampling time of recently sampled tips (all strains considered in this study  
346 have been sampled in the last 40 years). Moreover, by relying exclusively on recent  
347 calibration points to date older nodes, we ignored the issue of the time-dependency of the  
348 estimated clock rates [58]. According to the time-dependency hypothesis, evolutionary rate  
349 estimates depend on the age of the calibration points, with older calibration points resulting in  
350 lower rates. In MTBC, this topic was discussed at length in other publications, and the  
351 available data to date does not allow to confidently accept or reject that hypothesis [57, 59-  
352 62]. Our analysis assumes that rates of evolution do not depend on the age of the calibration  
353 points. Therefore, we potentially underestimate the age of the older nodes of the tree.  
354 Molecular archaeological evidence suggests indeed that our dating analyses possibly  
355 underestimate the age of the MRCA of *M. bovis*. In particular, 2000 years old *M. bovis* DNA  
356 reported as having the RD4 and RD17 deletions, was found in human remains in Siberia [63].  
357 The region of difference RD17 corresponds to RDEu1 [13], and defines the clonal complex  
358 Eu1 of *M. bovis*, which we estimate has evolved between the years 1236 and 1603 AD (Fig.  
359 3).  
360 As discussed elsewhere [57], both tip-dating and the analysis of ancient DNA have potential  
361 pitfalls, and these discrepancies cannot be reconciled without additional data. Nevertheless,  
362 the tip-dating calibration provided accurate results for the emergency of BCG strains and for  
363 the introduction of *M. bovis* to New Zealand [64, 65](TreeS1-S10), indicating that the method  
364 can reliably infer divergence times at least for events occurred in the last 200 years.

365

366

367 **Insights into the detailed population structure of *M. bovis* around the world**

368 Understanding the evolutionary history of the *M. bovis* populations requires understanding  
369 their geographic distribution at a continental scale. Our WGS data set has limited  
370 geographical resolution due to the biased sampling of certain regions of the world, and to the  
371 partial unavailability of associated metadata such as the origin of foreign-born TB patients  
372 from Western countries. To get more insights into the geographical ranges of the different *M.*  
373 *bovis* clades, we used the spoligotype patterns inferred from the WGS data and searched for  
374 references describing the prevalence of those in different regions of the world (Table S4).  
375 Patterns SB0120 and SB0134, known as “BCG-like” and reported to be relatively prevalent  
376 [9], as well as SB0944, are phylogenetically uninformative; SB0120 is present in several  
377 clades, and SB0134 and SB0944 have evolved independently in two different *M. bovis*  
378 populations (Fig. 2, Table S4).

379  
380 Our results suggest that the sister clade of all contemporary pyrazinamide resistant *M. bovis*,  
381 *PZA\_sus\_unknown1*, is restricted to East Africa. The same holds true for Af2, which is in  
382 accordance with previous reports [8, 12]. Our findings further suggest that the geographical  
383 distribution of the Af2 sister clade *unknown2* includes East Africa (Eritrea, Ethiopia), but also  
384 Southern Europe (Spain and France). Informative spoligotypes of the *unknown2* clade show  
385 that it also circulates in North Africa (Fig. 2, Table S4). Of note, the original strain, from  
386 which all BCG vaccine strains were derived, was isolated in France [66]. Our inferences  
387 suggest that a common ancestor of Af2 and *unknown2* evolved in East Africa, and while Af2  
388 remained geographically restricted, its sister clade *unknown2* has subsequently dispersed (Fig.  
389 2).

390 All remaining *M. bovis* descended from a common ancestor, for which the geographical  
391 origin was impossible to infer reliably with our data. However, the tree topology showed that  
392 from this ancestor several clades have evolved which are important causes of bovine TB  
393 today in different regions of the world (i.e., the clonal complexes Eu1, Eu2 and Af1; Fig.2).

394  
395 The most basal clade within this group is *unknown3*, which contained 25 genomes mostly  
396 isolated from humans (Table S1). The *in silico* derived spoligotypes suggest that the  
397 geographical spread of *unknown3* ranges from Western Asia to Eastern Europe, but also  
398 includes East Africa (Fig. 2, Table S4). The next split in our phylogeny corresponds to Af1,  
399 which has been characterized extensively using the deletion RD Af1 and spoligotyping, and  
400 shown to be most prevalent in countries from West- and Central Africa [11]. Here, we could  
401 only compile nine Af1 genomes, of which five originated in Ghana [67], and the remaining

402 had either a European or an unknown origin. The small diversity of Af1 spoligotypes found in  
403 our WGS dataset [11] indicates strong undersampling (Fig. 2, Table S4). Nevertheless, it was  
404 possible to estimate the divergence of the Af1 clade from the remaining *M. bovis* to a period  
405 ranging from the year 921 to 1449 AD (Fig. 3), making it unlikely that Af1 was originally  
406 brought to West Africa by Europeans [68].

407

408 The next split comprises clades *unknown4*, *unknown5* and Eu2. Clade *unknown4* was  
409 composed of 33 genomes with little geographic information and for which the most common  
410 spoligotyping pattern was the uninformative SB0120 (n=19). Additional *unknown4*  
411 spoligotypes indicate that strains belonging to this clade circulate in Southern Europe,  
412 Northern and Eastern Africa (Fig. 2, Table S4), supporting dispersion events between Africa  
413 and Southern Europe. Clade *unknown5* comprised only nine genomes isolated mostly from  
414 Zambian cattle. Its corresponding spoligotype is also SB0120, limiting further geographical  
415 inferences.

416 In contrast to the strains from clades *unknown4* and *unknown5*, among the 323 Eu2 genomes,  
417 no genomes of East African origin were found, and Africa was only represented by nine  
418 South African genomes [69]. By far, most Eu2 were isolated in the Americas. Previous  
419 studies have shown that Eu2 dominates in Southern Europe, particularly in the Iberian  
420 Peninsula [14], thus possibly the source of Eu2 in the Americas. There were no  
421 representatives of Eu2 from the Iberian Peninsula in our dataset. However, our molecular  
422 dating analysis revealed that the common ancestor of Eu2 evolved during the period 1416 to  
423 1705 AD (Fig. 3), which would be compatible with an introduction from Europe into the  
424 Americas.

425

426 Clonal complex Eu1, *unknown6*, *unknown7* and *unknown8*, form a sister group to the  
427 previously described. Eu1 has previously been characterized based on the RDEu1 deletion  
428 and spoligotyping, showing that it is highly prevalent in regions of the world that were former  
429 trading partners of the UK [8, 13]. That geographic range is well represented in our dataset,  
430 including many genomes from the UK (n=215) and Ireland (n=45) (Table S1). The latter were  
431 very closely related, suggesting that there was probably fixation of just a few genotypes in  
432 this region as previously proposed [8]. In contrast, most branching events within Eu1  
433 correspond to *M. bovis* isolated in North- and Central America as well as New Zealand,  
434 resulting from the expansion of clonal families not seen in the British Islands. Consequently,  
435 most of the genetic diversity of Eu1 exists outside of its putative region of origin. Our

436 molecular dating is compatible with this view, indicating that the ancestor of Eu1 is likely to  
437 have emerged between the years 1236 to 1603 AD (Fig. 3), with several Eu1 sub-clades  
438 evolving in the last 200-300 years (TreeS1-S10).

439 The closest relative to Eu1 is a genome from Ethiopia (*unknown8*) with the spoligotyping  
440 pattern SB1476, commonly found in Ethiopia [12]. *Unknown6* comprised seven genomes  
441 from North America (Fig. 2, Table S1, Table S4), whereas *unknown7* included eight genomes,  
442 four of which were isolated in Western Europe and another four without country of origin  
443 available. Spoligotyping patterns indicate that identical strains are common in Southern  
444 Europe, Northern and Eastern Africa expanding the geographic range of *unknown7*.

445

446

447

## 448 **CONCLUSIONS AND IMPLICATIONS**

449 We screened the public repositories and compiled 3364 genome sequences of *M. bovis* and *M.*  
450 *caprae* from 35 countries. Despite the biased geographic distribution of our samples, our  
451 results provide novel insights into the phylogeography of *M. bovis* and *M. caprae*. Our whole-  
452 genome based phylogeny showed that although certain spoligotypes are associated with  
453 specific monophyletic groups, prevalent patterns such as the so-called “BCG-like” should not  
454 be used to infer phylogenetic relatedness. Moreover, our data extend the previously known  
455 phylogenetic diversity of *M. bovis* by eight previously uncharacterized clades in addition to  
456 the four clonal complexes described previously. Among those, *Pza\_sus\_unknown 1* shares a  
457 common ancestor with the rest of *M. bovis*, has an exclusively East African distribution and  
458 does not share the PncA mutation H57D, conferring intrinsic resistance to PZA.

459 Our further inferences suggest that *M. bovis* evolved in East Africa. The evolutionary success  
460 of *M. bovis* is linked to the fact that it can infect and transmit very efficiently in cattle. Cattle  
461 have been domesticated twice independently; once in the Near East (*Bos taurus*) and once in  
462 the Indus Valley (*Bos indicus*) approximately 10 000 year ago, and both were introduced to  
463 Africa at different time points and various locations, subsequently interbreeding with local  
464 wild species [70]. Whereas *B. taurus* was introduced probably during the 6 millennium BC  
465 possibly through Egypt, *B. indicus* was most likely introduced twice, first during the second  
466 millennium BC and later during the Islamic conquests [71]. *M. bovis* could have emerged  
467 after the introduction of cattle, benefiting from the development of African pastoralism and  
468 expanding within the continent. The timing of these events is difficult to estimate; the initial  
469 introductions of cattle predate by several thousands of years our inferred temporal origin of

470 *M. bovis*. But as discussed, our estimates are possibly affected by the current uncertainty in  
471 dating deeper evolutionary events within the MTBC. Alternatively, *M. bovis* could have  
472 emerged in the Near East and been introduced to Africa together with cattle. We cannot test  
473 this hypothesis formally, as the Near East is poorly represented in our dataset. However, this  
474 scenario is difficult to reconcile with the restricted East African distribution of the  
475 *Pza\_sus\_unknown\_I* clade, as the Near East was also the origin of taurine cattle both in  
476 Europe and Asia, where no clade retaining the ancestral characteristic of pyrazinamide  
477 susceptibility was found.

478 While some *M. bovis* groups remained restricted to East Africa, others have dispersed to  
479 different parts of the world. The contemporary geographic distribution of *M. bovis* clades  
480 suggest that East- and North Africa, Southern Europe and Western Asia have played an  
481 important role in shaping the population structure of these pathogens. However, these regions  
482 were not well represented in our dataset. Thus, more *M. bovis* genomes from these regions are  
483 necessary to generate better insights, particularly given the central role of these regions in the  
484 history of cattle domestication [72]. From a more applied perspective, our work provides a  
485 global phylogenetic framework that can be further exploited to find better molecular markers  
486 for studying *M. bovis* in settings where genome sequencing cannot be easily implemented.

487  
488

#### 489 ACKNOWLEDGEMENTS

490 Calculations were performed at sciCORE (<http://scicore.unibas.ch/>) scientific computing core  
491 facility at University of Basel. This work was supported by the Swiss National Science  
492 Foundation (grants 310030\_166687, 310030\_188888, IZRJZ3\_164171, IZLSZ3\_170834 and  
493 CRSII5\_177163), the European Research Council (309540-EVODRTB) and SystemsX.ch.

494  
495

#### 496 REFERENCES

497

- 498 1. WHO; Global tuberculosis report 2018. Geneva: World Health Organization, 2018.
- 499 2. Olea-Popelka F, Muwonge A, Perera A, et al.; Zoonotic tuberculosis in human beings  
500 caused by *Mycobacterium bovis*-a call for action. *Lancet Infect Dis* 2017;**17**(1):e21-e25. doi:  
501 10.1016/S1473-3099(16)30139-6.
- 502 3. Muller B, Durr S, Alonso S, et al.; Zoonotic *Mycobacterium bovis*-induced  
503 tuberculosis in humans. *Emerg Infect Dis* 2013;**19**(6):899-908. doi: 10.3201/eid1906.120543.



- 504 4. Waters WR, Palmer MV, Buddle BM, et al.; Bovine tuberculosis vaccine research:  
505 historical perspectives and recent advances. *Vaccine* 2012;**30**(16):2611-22.
- 506 5. Tschopp R, Hattendorf J, Roth F, et al.; Cost estimate of bovine tuberculosis to  
507 Ethiopia. *Current topics in microbiology and immunology* 2013;**365**:249-68.
- 508 6. Michel AL, Muller B, van Helden PD; Mycobacterium bovis at the animal-human  
509 interface: a problem, or not? *Veterinary microbiology* 2010;**140**(3-4):371-81.
- 510 7. Gagneux S; Ecology and evolution of Mycobacterium tuberculosis. *Nat Rev Microbiol*  
511 2018;**16**(4):202-213. doi: 10.1038/nrmicro.2018.8.
- 512 8. Smith NH; The global distribution and phylogeography of Mycobacterium bovis  
513 clonal complexes. *Infect Genet Evol* 2012;**12**(4):857-65. doi: 10.1016/j.meegid.2011.09.007.
- 514 9. Ghavidel M, Mansury D, Nourian K, et al.; The most common spoligotype of  
515 Mycobacterium bovis isolated in the world and the recommended loci for VNTR typing; A  
516 systematic review. *Microbial Pathogenesis* 2018;**118**:310-315.
- 517 10. Comas I, Homolka S, Niemann S, et al.; Genotyping of genetically monomorphic  
518 bacteria: DNA sequencing in mycobacterium tuberculosis highlights the limitations of current  
519 methodologies. *PLoS ONE* 2009;**4**(11):e7815. doi: 10.1371/journal.pone.0007815.
- 520 11. Muller B, Hilty M, Berg S, et al.; African 1; An Epidemiologically Important Clonal  
521 Complex of Mycobacterium bovis Dominant in Mali, Nigeria, Cameroon and Chad. *J*  
522 *Bacteriol* 2009;**191**(6): 1951-1960. doi: 10.1128/JB.01590-08.
- 523 12. Berg S, Garcia-Pelayo MC, Muller B, et al.; African 2, a clonal complex of  
524 Mycobacterium bovis epidemiologically important in East Africa. *J Bacteriol*  
525 2011;**193**(3):670-8. doi: 10.1128/JB.00750-10.
- 526 13. Smith NH, Berg S, Dale J, et al.; European 1: a globally important clonal complex of  
527 Mycobacterium bovis. *Infect Genet Evol* 2011;**11**(6):1340-51. doi:  
528 10.1016/j.meegid.2011.04.027.
- 529 14. Rodriguez-Campos S, Schurch AC, Dale J, et al.; European 2--a clonal complex of  
530 Mycobacterium bovis dominant in the Iberian Peninsula. *Infect Genet Evol* 2012;**12**(4):866-  
531 72. doi: 10.1016/j.meegid.2011.09.004.
- 532 15. Crispell J, Zadoks RN, Harris SR, et al.; Using whole genome sequencing to  
533 investigate transmission in a multi-host system: bovine tuberculosis in New Zealand. *BMC*  
534 *genomics* 2017;**18**(1):180.
- 535 16. Orloski K, Robbe-Austerman S, Stuber T, et al.; Whole Genome Sequencing of  
536 Mycobacterium bovis Isolated From Livestock in the United States, 1989-2018. *Front Vet Sci*  
537 2018;**5**:253. doi: 10.3389/fvets.2018.00253.

- 538 17. Salvador LCM, O'Brien DJ, Cosgrove MK, et al.; Disease management at the wildlife-  
539 livestock interface: Using whole-genome sequencing to study the role of elk in  
540 *Mycobacterium bovis* transmission in Michigan, USA. *Mol Ecol* 2019;**28**(9):2192-2205. doi:  
541 10.1111/mec.15061.
- 542 18. Price-Carter M, Brauning R, de Lisle GW, et al.; Whole Genome Sequencing for  
543 Determining the Source of *Mycobacterium bovis* Infections in Livestock Herds and Wildlife  
544 in New Zealand. *Front Vet Sci* 2018;**5**:272. doi: 10.3389/fvets.2018.00272.
- 545 19. Brites D, Loiseau C, Menardo F, et al.; A New Phylogenetic Framework for the  
546 Animal-Adapted *Mycobacterium tuberculosis* Complex. *Frontiers in microbiology*  
547 2018;**9**:2820.
- 548 20. Menardo F, Loiseau C, Brites D, et al.; Treemmer: a tool to reduce large phylogenetic  
549 datasets with minimal loss of diversity. *BMC Bioinformatics* 2018;**19**(1):164. doi:  
550 10.1186/s12859-018-2164-8.
- 551 21. Bolger AM, Lohse M, Usadel B; Trimmomatic: a flexible trimmer for Illumina  
552 sequence data. *Bioinformatics* 2014;**30**(15):2114-20. doi: 10.1093/bioinformatics/btu170.
- 553 22. Comas I, Chakravarti J, Small PM, et al.; Human T cell epitopes of *Mycobacterium*  
554 *tuberculosis* are evolutionarily hyperconserved. *Nat Genet* 2010;**42**(6):498-503. doi:  
555 10.1038/ng.590.
- 556 23. Li H, Handsaker B, Wysoker A, et al.; The Sequence Alignment/Map format and  
557 SAMtools. *Bioinformatics* 2009;**25**(16):2078-9. doi: btp352 [pii]  
558 10.1093/bioinformatics/btp352.
- 559 24. McKenna A, Hanna M, Banks E, et al.; The Genome Analysis Toolkit: a MapReduce  
560 framework for analyzing next-generation DNA sequencing data. *Genome Res*  
561 2010;**20**(9):1297-303. doi: 10.1101/gr.107524.110.
- 562 25. Li H; A statistical framework for SNP calling, mutation discovery, association  
563 mapping and population genetical parameter estimation from sequencing data. *Bioinformatics*  
564 2011;**27**(21):2987-93. doi: 10.1093/bioinformatics/btr509.
- 565 26. Koboldt DC, Zhang Q, Larson DE, et al.; VarScan 2: somatic mutation and copy  
566 number alteration discovery in cancer by exome sequencing. *Genome Res* 2012;**22**(3):568-76.  
567 doi: 10.1101/gr.129684.111.
- 568 27. Cingolani P, Platts A, Wang le L, et al.; A program for annotating and predicting the  
569 effects of single nucleotide polymorphisms, SnpEff: SNPs in the genome of *Drosophila*  
570 *melanogaster* strain w1118; iso-2; iso-3. *Fly (Austin)* 2012;**6**(2):80-92. doi:  
571 10.4161/fly.19695.
- 572 28. Garnier T, Eiglmeier K, Camus JC, et al.; The complete genome sequence of  
573 *Mycobacterium bovis*. *Proc Natl Acad Sci U S A* 2003;**100**(13):7877-82.

- 574 29. Steiner A, Stucki D, Coscolla M, et al.; KvarQ: targeted and direct variant calling from  
575 fastq reads of bacterial genomes. *BMC Genomics* 2014;**15**:881. doi: 10.1186/1471-2164-15-  
576 881.
- 577 30. Smith NH, Upton P; Naming spoligotype patterns for the RD9-deleted lineage of the  
578 *Mycobacterium tuberculosis* complex; [www.Mbovis.org](http://www.Mbovis.org). *Infection, genetics and evolution :  
579 journal of molecular epidemiology and evolutionary genetics in infectious diseases*  
580 2012;**12**(4):873-6.
- 581 31. Mostowy S, Inwald J, Gordon S, et al.; Revisiting the evolution of *Mycobacterium*  
582 *bovis*. *J Bacteriol* 2005;**187**(18):6386-95.
- 583 32. Brosch R, Gordon SV, Garnier T, et al.; Genome plasticity of BCG and impact on  
584 vaccine efficacy. *Proc Natl Acad Sci U S A* 2007.
- 585 33. Salamon H, Kato-Maeda M, Small PM, et al.; Detection of deleted genomic DNA  
586 using a semiautomated computational analysis of GeneChip data. *Genome Res*  
587 2000;**10**(12):2044-54.
- 588 34. Stucki D, Brites D, Jeljeli L, et al.; *Mycobacterium tuberculosis* lineage 4 comprises  
589 globally distributed and geographically restricted sublineages. *Nat Genet* 2016;**48**(12):1535-  
590 1543. doi: 10.1038/ng.3704.
- 591 35. Miller MA, Pfeiffer W, Schwartz T; Creating the CIPRES Science Gateway for  
592 inference of large phylogenetic trees. *Proceedings of the Gateway Computing Environments*  
593 *Workshop (GCE)*. New Orleans, LA, 2010, 1-8.
- 594 36. Copin R, Coscolla M, Efstathiadis E, et al.; Impact of in vitro evolution on antigenic  
595 diversity of *Mycobacterium bovis* bacillus Calmette-Guerin (BCG). *Vaccine*  
596 2014;**32**(45):5998-6004. doi: 10.1016/j.vaccine.2014.07.113.
- 597 37. Revell LJ; phytools: an R package for phylogenetic comparative biology (and other  
598 things). *Methods in Ecology and Evolution* 2011;**3**(2):217-223.
- 599 38. Lewis PO; A likelihood approach to estimating phylogeny from discrete  
600 morphological character data. *Syst Biol* 2001;**50**(6):913-25. doi:  
601 10.1080/106351501753462876.
- 602 39. Team RC; R: A language and environment for statistical computing. R Foundation for  
603 Statistical Computing. Vienna, Austria, 2019.
- 604 40. Bollback JP; SIMMAP: stochastic character mapping of discrete traits on phylogenies.  
605 *BMC Bioinformatics* 2006;**7**:88. doi: 10.1186/1471-2105-7-88.
- 606 41. Paradis E, Schliep K; ape 5.0: an environment for modern phylogenetics and  
607 evolutionary analyses in R. *Bioinformatics* 2019;**35**(3):526-528. doi:  
608 10.1093/bioinformatics/bty633.

- 609 42. To TH, Jung M, Lycett S, et al.; Fast Dating Using Least-Squares Criteria and  
610 Algorithms. *Systematic Biology* 2016;**65**(1):82-97. doi: 10.1093/sysbio/syv068.
- 611 43. Darriba D, Taboada GL, Doallo R, et al.; jModelTest 2: more models, new heuristics  
612 and parallel computing. *Nature Methods* 2012;**9**(8):772-772. doi: DOI 10.1038/nmeth.2109.
- 613 44. Bouckaert R, Heled J, Kuhnert D, et al.; BEAST 2: a software platform for Bayesian  
614 evolutionary analysis. *PLoS Comput Biol* 2014;**10**(4):e1003537. doi:  
615 10.1371/journal.pcbi.1003537.
- 616 45. Drummond AJ, Ho SYW, Phillips MJ, et al.; Relaxed phylogenetics and dating with  
617 confidence. *Plos Biology* 2006;**4**(5):699-710. doi: ARTN e88  
618 10.1371/journal.pbio.0040088.
- 619 46. Drummond AJ, Rambaut A, Shapiro B, et al.; Bayesian coalescent inference of past  
620 population dynamics from molecular sequences. *Mol Biol Evol* 2005;**22**(5):1185-92. doi:  
621 msi103 [pii]  
622 10.1093/molbev/msi103.
- 623 47. Rambaut A, Drummond AJ, Xie D, et al.; Posterior Summarization in Bayesian  
624 Phylogenetics Using Tracer 1.7. *Systematic Biology* 2018;**67**(5):901-904. doi:  
625 10.1093/sysbio/syy032.
- 626 48. Rambaut A, Drummond AJ, Xie D, et al.; Posterior Summarization in Bayesian  
627 Phylogenetics Using Tracer 1.7. *Syst Biol* 2018;**67**(5):901-904. doi: 10.1093/sysbio/syy032.
- 628 49. Rodriguez S, Bezos J, Romero B, et al.; Mycobacterium caprae Infection in Livestock  
629 and Wildlife, Spain. *Emerging Infectious Diseases* 2011;**17**(3):532-535. doi:  
630 10.3201/eid1703.100618.
- 631 50. Prodinge WM, Brandstatter A, Naumann L, et al.; Characterization of  
632 Mycobacterium caprae isolates from Europe by mycobacterial interspersed repetitive unit  
633 genotyping. *J Clin Microbiol* 2005;**43**(10):4984-92.
- 634 51. Yoshida S, Suga S, Ishikawa S, et al.; Mycobacterium caprae Infection in Captive  
635 Borneo Elephant, Japan. *Emerg Infect Dis* 2018;**24**(10):1937-1940. doi:  
636 10.3201/eid2410.180018.
- 637 52. Consortium C, the GP, Allix-Beguec C, et al.; Prediction of Susceptibility to First-  
638 Line Tuberculosis Drugs by DNA Sequencing. *N Engl J Med* 2018;**379**(15):1403-1415. doi:  
639 10.1056/NEJMoa1800474.
- 640 53. Aranaz A, Cousins D, Mateos A, et al.; Elevation of Mycobacterium tuberculosis  
641 subsp. caprae Aranaz et al. 1999 to species rank as Mycobacterium caprae comb. nov., sp.  
642 nov. *Int J Syst Evol Microbiol* 2003;**53**(Pt 6):1785-9.

- 643 54. Broeckl S, Krebs S, Varadharajan A, et al.; Investigation of intra-herd spread of  
644 *Mycobacterium caprae* in cattle by generation and use of a whole-genome sequence. *Vet Res*  
645 *Commun* 2017;**41**(2):113-128. doi: 10.1007/s11259-017-9679-8.
- 646 55. Domogalla J, Prodinger WM, Blum H, et al.; Region of difference 4 in alpine  
647 *Mycobacterium caprae* isolates indicates three variants. *J Clin Microbiol* 2013;**51**(5):1381-8.  
648 doi: 10.1128/JCM.02966-12.
- 649 56. Loiseau C, Brites D, Moser I, et al.; Revised Interpretation of the Hain Lifescience  
650 GenoType MTBC To Differentiate *Mycobacterium canettii* and Members of the  
651 *Mycobacterium tuberculosis* Complex. *Antimicrobial Agents and Chemotherapy* 2019;**63**(6).  
652 doi: ARTN e00159-19  
653 10.1128/AAC.00159-19.
- 654 57. Menardo F, Duchene S, Brites D, et al.; The molecular clock of *Mycobacterium*  
655 *tuberculosis*. *PLoS Pathog* 2019;**15**(9):e1008067. doi: 10.1371/journal.ppat.1008067.
- 656 58. Ho SY, Phillips MJ, Cooper A, et al.; Time dependency of molecular rate estimates  
657 and systematic overestimation of recent divergence times. *Mol Biol Evol* 2005;**22**(7):1561-8.  
658 doi: 10.1093/molbev/msi145.
- 659 59. Comas I, Coscolla M, Luo T, et al.; Out-of-Africa migration and Neolithic  
660 coexpansion of *Mycobacterium tuberculosis* with modern humans. *Nat Genet*  
661 2013;**45**(10):1176-82. doi: 10.1038/ng.2744.
- 662 60. Pepperell CS, Casto AM, Kitchen A, et al.; The role of selection in shaping diversity  
663 of natural *M. tuberculosis* populations. *PLoS Pathog* 2013;**9**(8):e1003543. doi:  
664 10.1371/journal.ppat.1003543.
- 665 61. Bos KI, Harkins KM, Herbig A, et al.; Pre-Columbian mycobacterial genomes reveal  
666 seals as a source of New World human tuberculosis. *Nature* 2014;**514**(7523):494-7. doi:  
667 10.1038/nature13591.
- 668 62. Eldholm V, Pettersson JH, Brynildsrud OB, et al.; Armed conflict and population  
669 displacement as drivers of the evolution and dispersal of *Mycobacterium tuberculosis*. *Proc*  
670 *Natl Acad Sci U S A* 2016;**113**(48):13881-13886. doi: 10.1073/pnas.1611283113.
- 671 63. Taylor GM, Murphy E, Hopkins R, et al.; First report of *Mycobacterium bovis* DNA  
672 in human remains from the Iron Age. *Microbiology* 2007;**153**(Pt 4):1243-9.
- 673 64. Behr MA, Small PM; A historical and molecular phylogeny of BCG strains. *Vaccine*  
674 1999;**17**(7-8):915-922.
- 675 65. Binney BM, Biggs PJ, Carter PE, et al.; Quantification of historical livestock  
676 importation into New Zealand 1860-1979. *N Z Vet J* 2014;**62**(6):309-14. doi:  
677 10.1080/00480169.2014.914861.

- 678 66. Oettinger T, Jorgensen M, Ladefoged A, et al.; Development of the Mycobacterium  
679 bovis BCG vaccine: review of the historical and biochemical evidence for a genealogical tree.  
680 *Tuber Lung Dis* 1999;**79**(4):243-50. doi: 10.1054/tuld.1999.0206.
- 681 67. Otchere ID, van Tonder AJ, Asante-Poku A, et al.; Molecular epidemiology and whole  
682 genome sequencing analysis of clinical Mycobacterium bovis from Ghana. *PLoS One*  
683 2019;**14**(3):e0209395. doi: 10.1371/journal.pone.0209395.
- 684 68. Muwonge A, Franklyn E, Mark B, et al.; Molecular Epidemiology of Mycobacterium  
685 bovis in Africa. In: B. DA, J. KNP, O. TCs (eds). *Tuberculosis in Animals: An African*  
686 *Perspective*. Switzerland: Springer, 2019, 127-170.
- 687 69. Dippenaar A, Parsons SDC, Miller MA, et al.; Progenitor strain introduction of  
688 Mycobacterium bovis at the wildlife-livestock interface can lead to clonal expansion of the  
689 disease in a single ecosystem. *Infect Genet Evol* 2017;**51**:235-238. doi:  
690 10.1016/j.meegid.2017.04.012.
- 691 70. Loftus RT, MacHugh DE, Bradley DG, et al.; Evidence for two independent  
692 domestications of cattle. *Proc Natl Acad Sci U S A* 1994;**91**(7):2757-61.
- 693 71. Verdugo MP, Mullin VE, Scheu A, et al.; Ancient cattle genomics, origins, and rapid  
694 turnover in the Fertile Crescent. *Science* 2019;**365**(6449):173-176. doi:  
695 10.1126/science.aav1002.
- 696 72. Decker JE, McKay SD, Rolf MM, et al.; Worldwide Patterns of Ancestry, Divergence,  
697 and Admixture in Domesticated Cattle. *Plos Genetics* 2014;**10**(3). doi: ARTN e1004254  
698 10.1371/journal.pgen.1004254.
- 699 73. Rambaut A; FigTree. Edinburgh: Institute of Evolutionary Biology, University of  
700 Edinburgh, 2010.  
701

## 703 **FIGURE LEGENDS**

704

705 **Figure 1** – Geographic distribution of the *M. bovis* samples used in this study according to  
706 isolation country. The circles correspond to pie charts and are coloured according to clonal  
707 complexes.

708

709 **Figure 2** – Maximum likelihood phylogeny of 476 of the 3364 genomes included in this  
710 study (redundant genomes were removed), and inferred from 22 492 variable positions. The  
711 scale bar indicates the number of substitutions per polymorphic site. The phylogeny is rooted  
712 on a *M. tuberculosis* Lineage 6 genome from Ghana (not shown) and bootstrap values are

713 shown for the most important splits. The coloured bars on the side of the phylogeny show the  
714 different clonal complexes. Other “unknown” monophyletic clades are coloured in black and  
715 additionally the branches of the eight clades are coloured to show their phylogenetic position  
716 more precisely. The pie charts mapped on the tree represent the summary posterior  
717 probabilities (from 100 runs) of the reconstructed ancestral geographic states and are coloured  
718 according to geographical UN region. Inferred spoligotype patterns from WGS described in  
719 *M. bovis* spoligotype database [30] are indicated for the unknown clades. The red circles at  
720 the tips correspond to the eight newly sequenced genomes. Regions of difference (RD) as in  
721 [31] are indicated; superscript + and - refers to presence of the region or its deletion,  
722 respectively.

723

724

725 **Figure 3** – The inferred age of main monophyletic clades according to LSD and BEAST  
726 dating analyses. For BEAST we report the results of the two analyses that resulted in the  
727 lowest clock rate (subset1 Bayesian Skyline) and in the highest clock rate (subset3  
728 exponential population growth). The confidence intervals reported correspond to the merged  
729 HPD interval of the two BEAST analyses mentioned above. The BEAST analysis was based  
730 on 300 genomes and the LSD analysis was based on 2058 genomes (see methods section for  
731 subsampling strategy). Only one genome from the Af1 clonal complex was included in the  
732 dating analyses and therefore the dates reported correspond to the node where Af1 diverged.

733

734 **Supplementary Figures:**

735

736 **Figure S1** – Flow chart showing the selection of genomes.

737

738 **Figure S2** - Geographic distribution of the *M. bovis* samples with unknown classification  
739 used in this study according to isolation country.

740

741 **Figure S3** – Maximum likelihood phylogeny of all 3364 genomes, based on 45 981 variable  
742 positions. The scale bar indicates the number of substitutions per polymorphic site. The  
743 phylogeny is rooted on a *M. tuberculosis* Lineage 6 genome from Ghana. The outer ring  
744 indicates the geographical region from which the strains were isolated. The four clonal  
745 complexes are highlighted on the tree. Branches corresponding to BCG genomes are coloured  
746 in grey and the *PncA* mutation H57D is indicated by a yellow star.

747

748 **Figure S4** – Phylogeographic reconstruction of *M. bovis* and *M. caprae*, inferred from 392  
749 genomes. Thirteen UN-defined geographic regions were assigned to the discrete character  
750 geographic origin, and mapped onto the phylogeny. Pie charts at internal nodes represent the  
751 summary posterior probabilities (from 100 runs) of the reconstructed ancestral geographic  
752 states and are coloured according to geographical UN region.

753

754 **Figure S5** – A) Tip-to-root regression and B) Date randomization tests (DTR). The  
755 confidence interval of the clock rate estimate for the observed data does not overlap with the  
756 confidence intervals of the clock rate estimates obtained from the randomized sets.

757

758 **Supplemental Tables:**

759

760 **Table S1** - List of genomes included in this study along with metadata used for the analyses.

761

762 **Table S2** - Comparison of models for discrete character evolution using likelihood ratio tests.

763

764 **Table S3** – Results of all BEAST analyses.

765

766 **Table S4** - Spoligotype patterns determined *in silico* for different clonal complex groups with  
767 reference to other studies.

768

769 **Supplementary files:**

770 **TreeS1-S10** Ten time-calibrated trees resulted from the molecular clock analyses. The file  
771 names indicate the software used (LSD or BEAST), the subsample, and the coalescent  
772 population prior (BSP: Bayesian Skyline; exponential: exponential population growth;  
773 constant: constant population size). Tip labels are present in Table S1. Ages in years before  
774 present can be visualized as well as the 95% High Posterior Density (HPD) (BEAST trees)  
775 using FigTree [73].

776

777

778

779

780



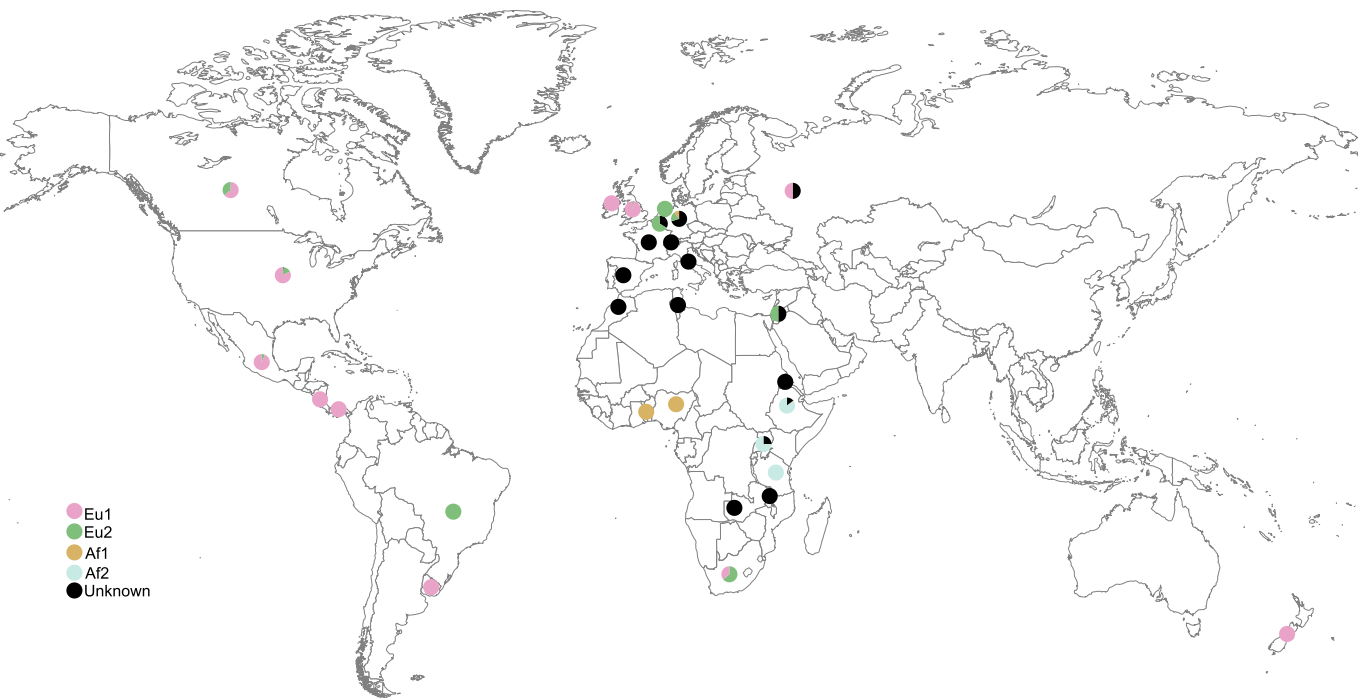

Ancestral reconstruction  
Geographical UN region

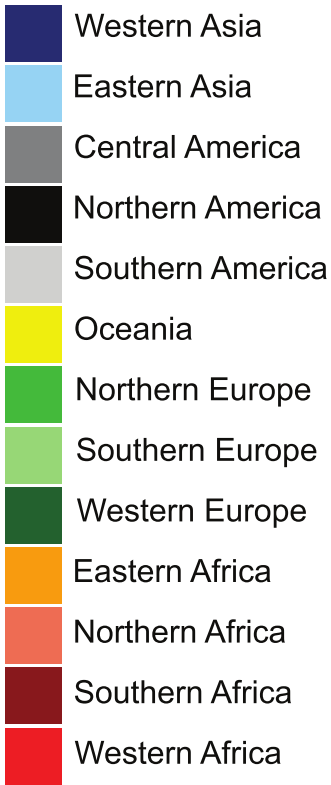

Clonal Complex

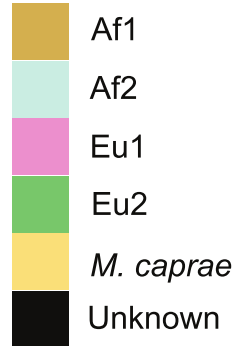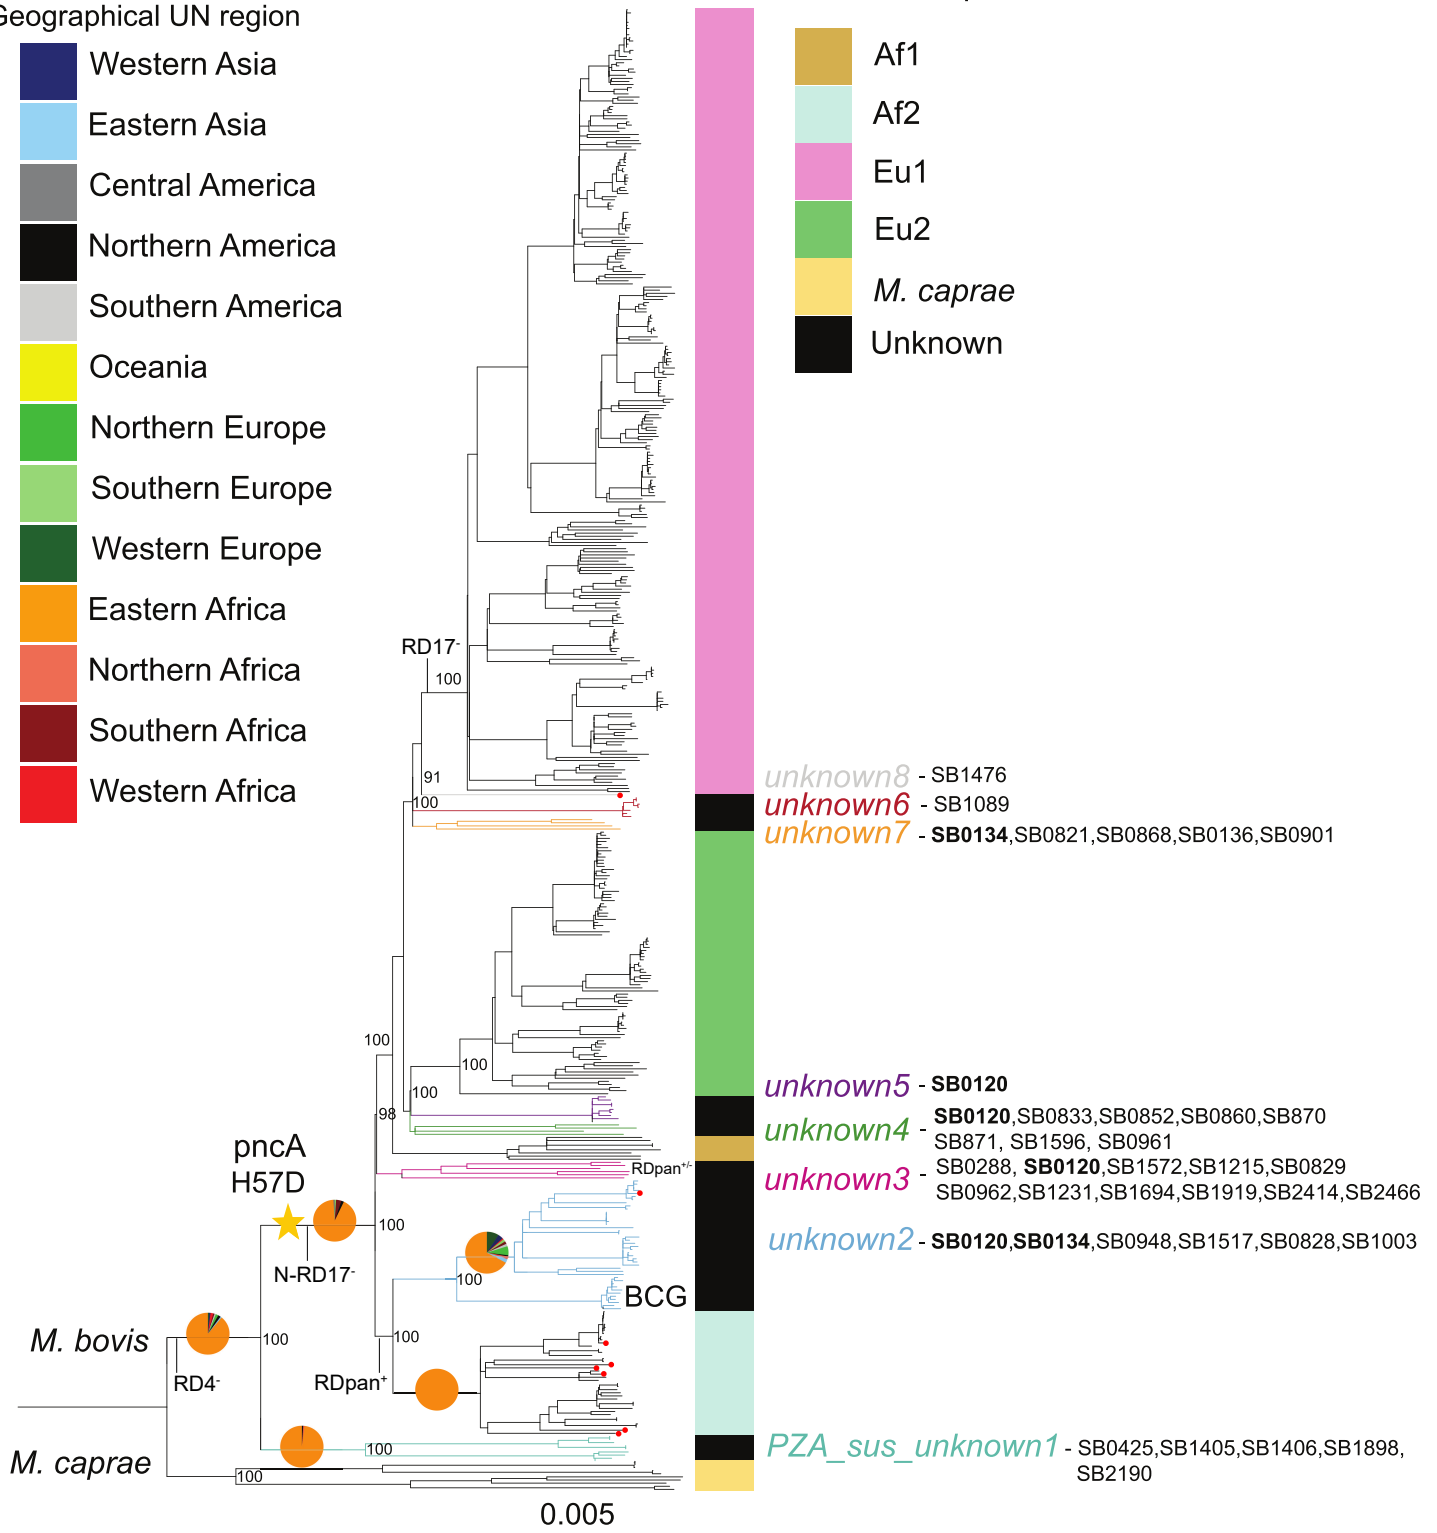

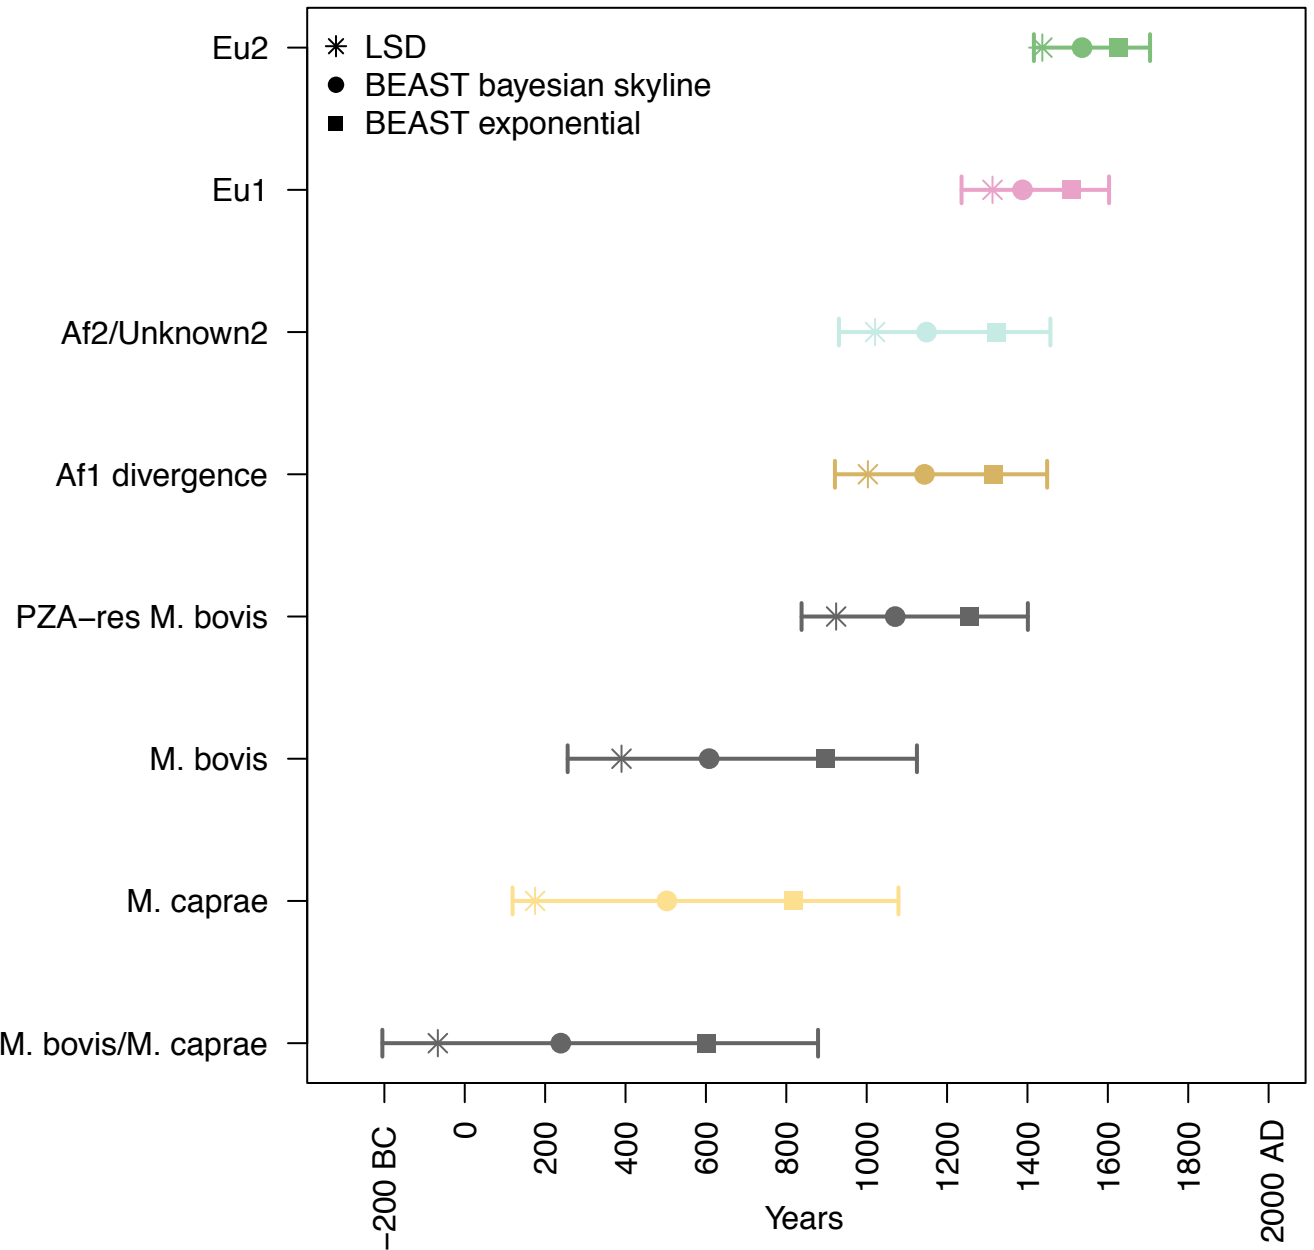

Source: https://www.biorxiv.org/content/10.1101/773192v3.full.pdf
