# Supplementary material for: An African origin for Mycobacterium bovis
Source: bioRxiv or medRxiv preprint supplement (doi:10.1101/773192), 2020-01-20
Supplement: Supplementary file [file media-1.pdf]

**Public *M. caprae*  
genomes  
downloaded from  
NCBI  
n = 81**

**Public *M. bovis*  
genomes  
downloaded from  
NCBI  
n = 3929**

**N=457** excluded because part of a pre-publication release  
**N=130** excluded because called BCG on NCBI  
**N=1** excluded because misclassification  
**N=3** excluded because RNA-seq library

**N=8** newly sequenced genomes  
(PRJEB33773)

**Genomes analysed  
with WGS pipeline  
n = 81**

**Genomes analysed  
with WGS pipeline  
n = 3346**

**N=4** genomics analysis failed  
(low coverage, ratio het/homo > 1)

**N=59** genomics analysis failed  
(low coverage, ratio het/homo > 1)

**Final dataset  
n = 3364**
