# Supplementary material for: An African origin for Mycobacterium bovis
Source: bioRxiv or medRxiv preprint supplement (doi:10.1101/773192), 2020-01-20

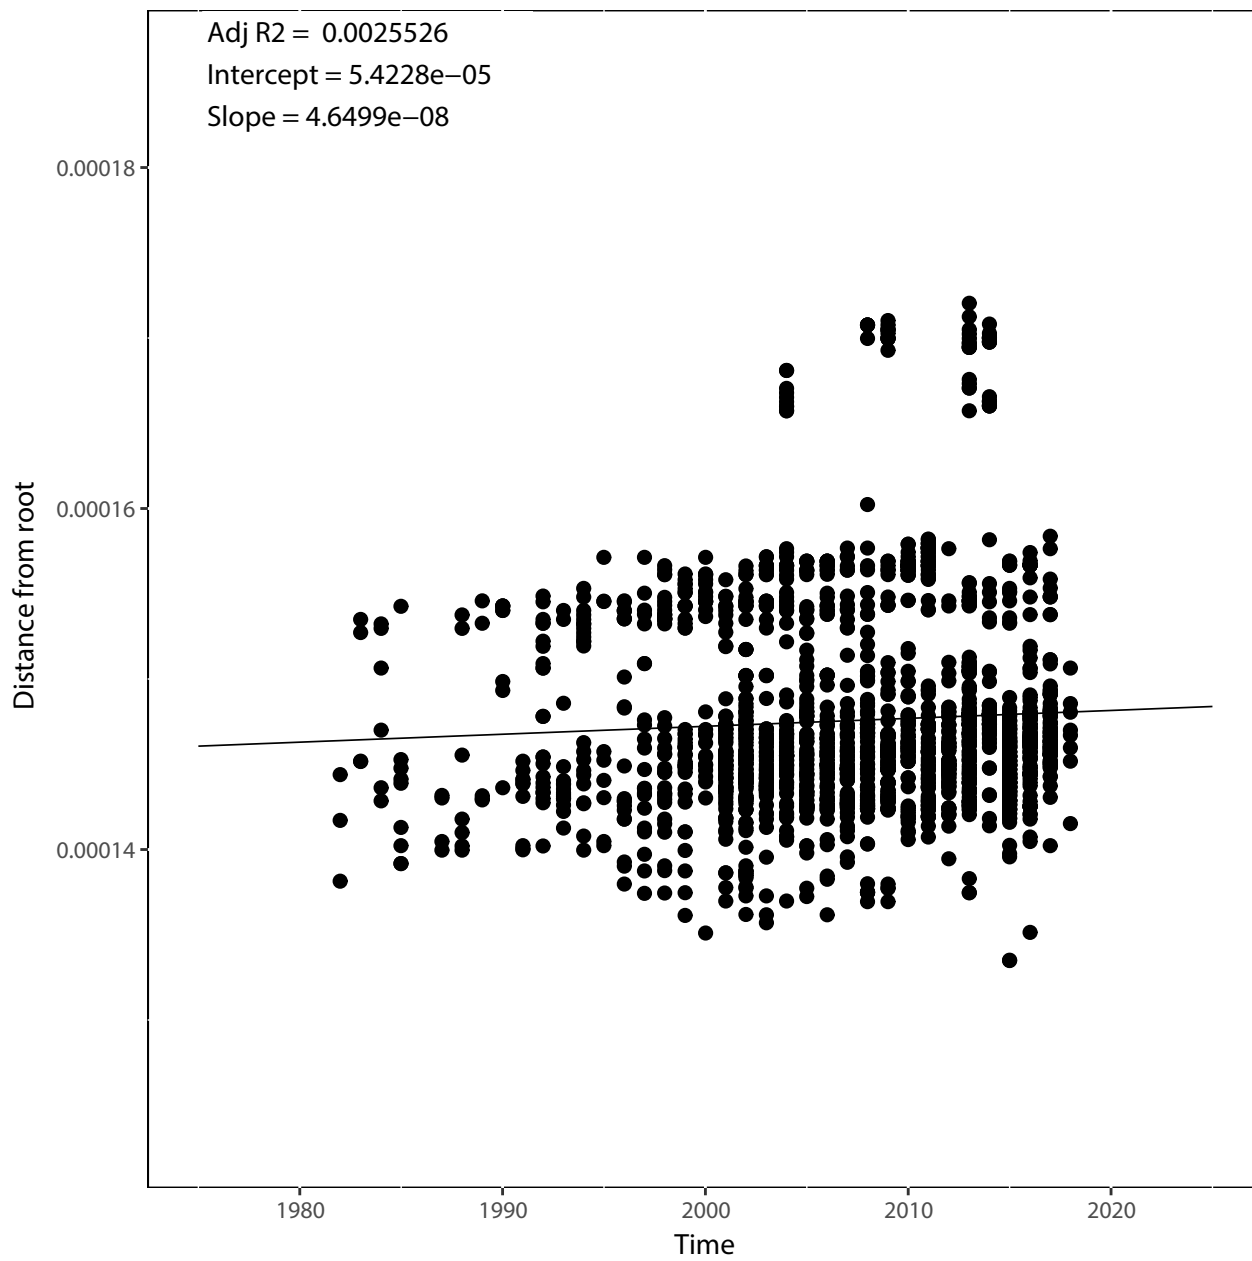

Supplement: Supplementary file [file media-5.pdf]
